# Supplementary material
Source: publisher figshare collection journal article supplement (https://tandf.figshare.com/ndownloader/files/15616100)
Supplement: Supplementary file 1 [file 15616100]

# Appendix





**Figure S 1** a-c) TG and d-f) DTG of foam samples with densities of 50, 70, and 100 kg/m³





**Figure S 2** a) TG and b) DTG graphs for PUR foams as well as c) TG and d) DTG graphs for PUR-FR foams





**Figure S 3** HRR curves of a) PUR and b) PUR-FR foams for each density tested
